# Supplementary material for: LncRNA XIST promotes myocardial infarction by regulating FOS through targeting miR-101a-3p
Source: publisher site journal article supplement (doi:10.18632/aging.103072), 2020-04-21
Supplement: Supplementary file [file aging-v12i8-103072-supplementary-material-SD1.pdf]

## SUPPLEMENTARY TABLES

**Supplementary Table 1. Primer sequences for PCR and qRT-PCR.**

| <b>Gene</b>      | <b>Forward primers (5'→3')</b> | <b>Reverse primers (5'→3')</b> |
|------------------|--------------------------------|--------------------------------|
| Mmu-XIST         | GTCAGCAAGAGCCTTGAATTG          | TTTGCTGAGTCTTGAGGAGAATC        |
| Mmu <i>c-Fos</i> | TGGCTGGTGCAGCCCACTCT           | CTTCACCATTCCCCTCTGGCG          |
| Mmu-GAPDH        | GGG AAGCCCATCACCATCTTC         | AGAGGGGCCATCCACAGTCT           |
| Mmu-miR-101a-3p  | TGGGCTA CAGTACTGTGATA          | TGCGTGTCTGTGGAGTC              |
| Mmu-U6           | CGCTTCACGAATTTGCGTGTGCAT       | GCTTCGGCACATATACTAAAAT         |

**Supplementary Table 2. Regent for transfection.**

| <b>Regent</b>         | <b>Sense (5'→3')</b>      | <b>Antisense (5'→3')</b>  |
|-----------------------|---------------------------|---------------------------|
| XIST siRNA1           | GCACUUCUCUUGUCAAUU        | AUAUUGACAAGAGAAGUGC       |
| XIST siRNA2           | GCUCUUCAUUUGGACUUA        | UUAAGUCCAAAUGAAGAGC       |
| XIST siRNA3           | AUAACAGUAAGUCUGAUAGAGGACA | UGUCCUCUAUCAGACUUACUGUUU  |
| siRNA control         | UUACUCAUGUGUCAUAACACAGGUG | CACCUGUGUUAUGACACAUGAGUAA |
| miR-101a-3p mimics    | UACAGUACUGUGAUUACUGAA     | UUCAGUUAUCACAGUACUGUA     |
| NC mimics             | UUCUCCGAACGUGUCACGUTT     | ACGUGACACGUUCGGAGAATT     |
| miR-101a-3p inhibitor | TTATCACAGTACTGT           |                           |
| NC inhibitor          | ACGTCTATACGCCA            |                           |
